# Supplementary material for: Subsequent hip fractures in patients identified by a Fracture Liaison Service (FLS) in England and Wales – linkage of the national FLS and Hip Fracture databases
Source: bioRxiv or medRxiv preprint supplement (doi:10.1101/2022.01.10.22268911), 2022-01-19

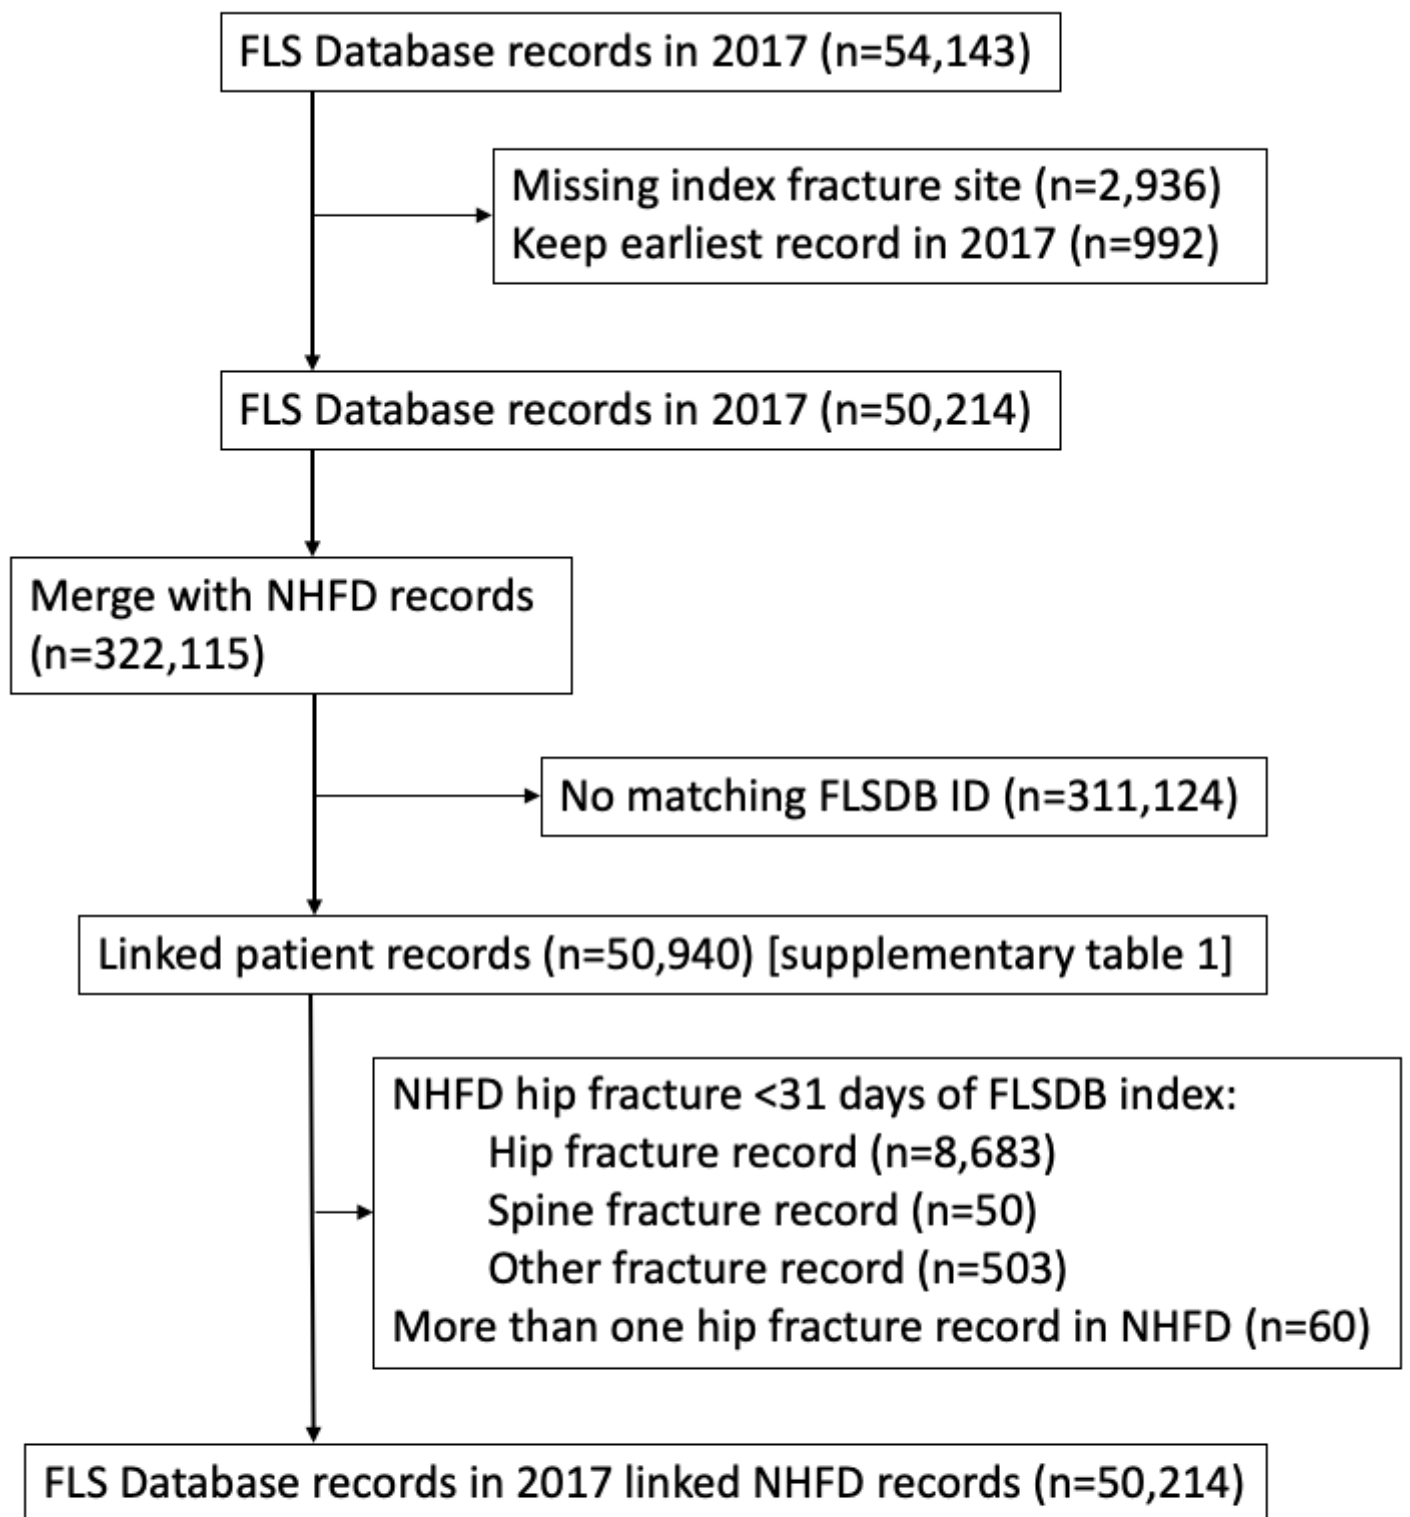

Supplement: Supplementary file [file media-2.pdf]
